# Supplementary material
Source: publisher site journal article supplement (https://www.dovepress.com/article/483093)
Supplement: Supplementary file 1 [file get_supplementary_file.php]

**
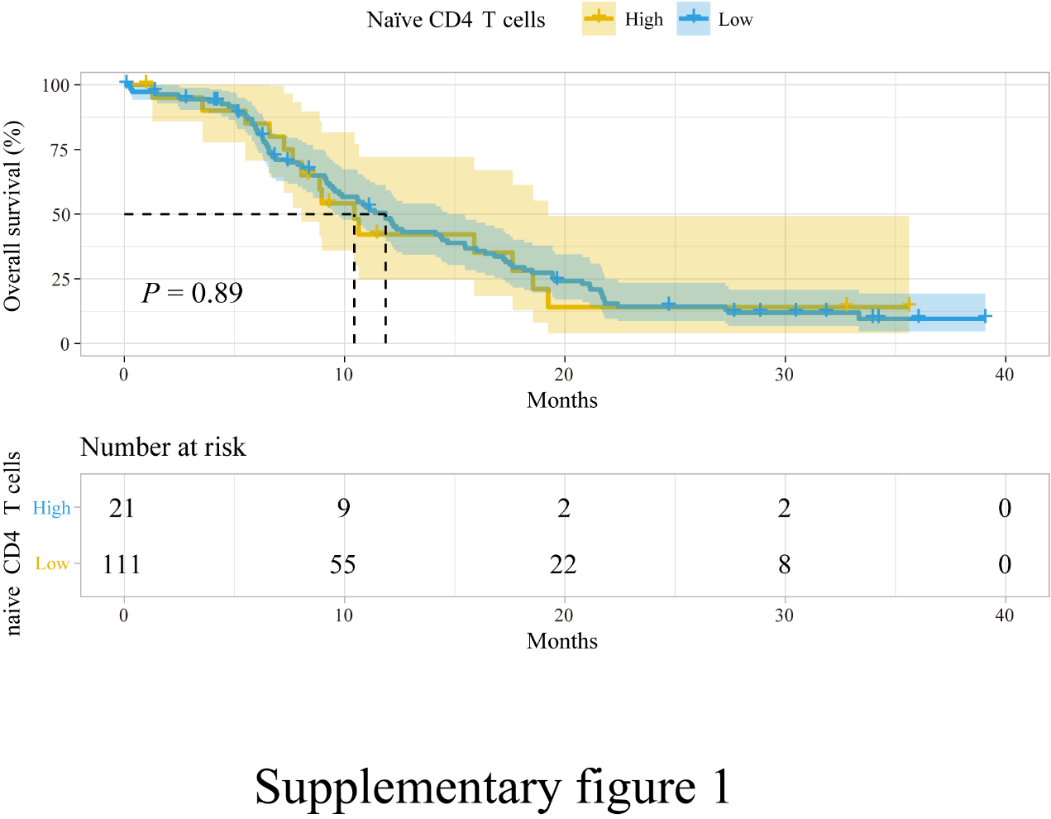
**

**Supplementary figure 1.** Survival analysis between CD4 naïve T cell high and CD4 naïve T cell low in ES-SCLC patients harboring < 4 metastatic sites.

**
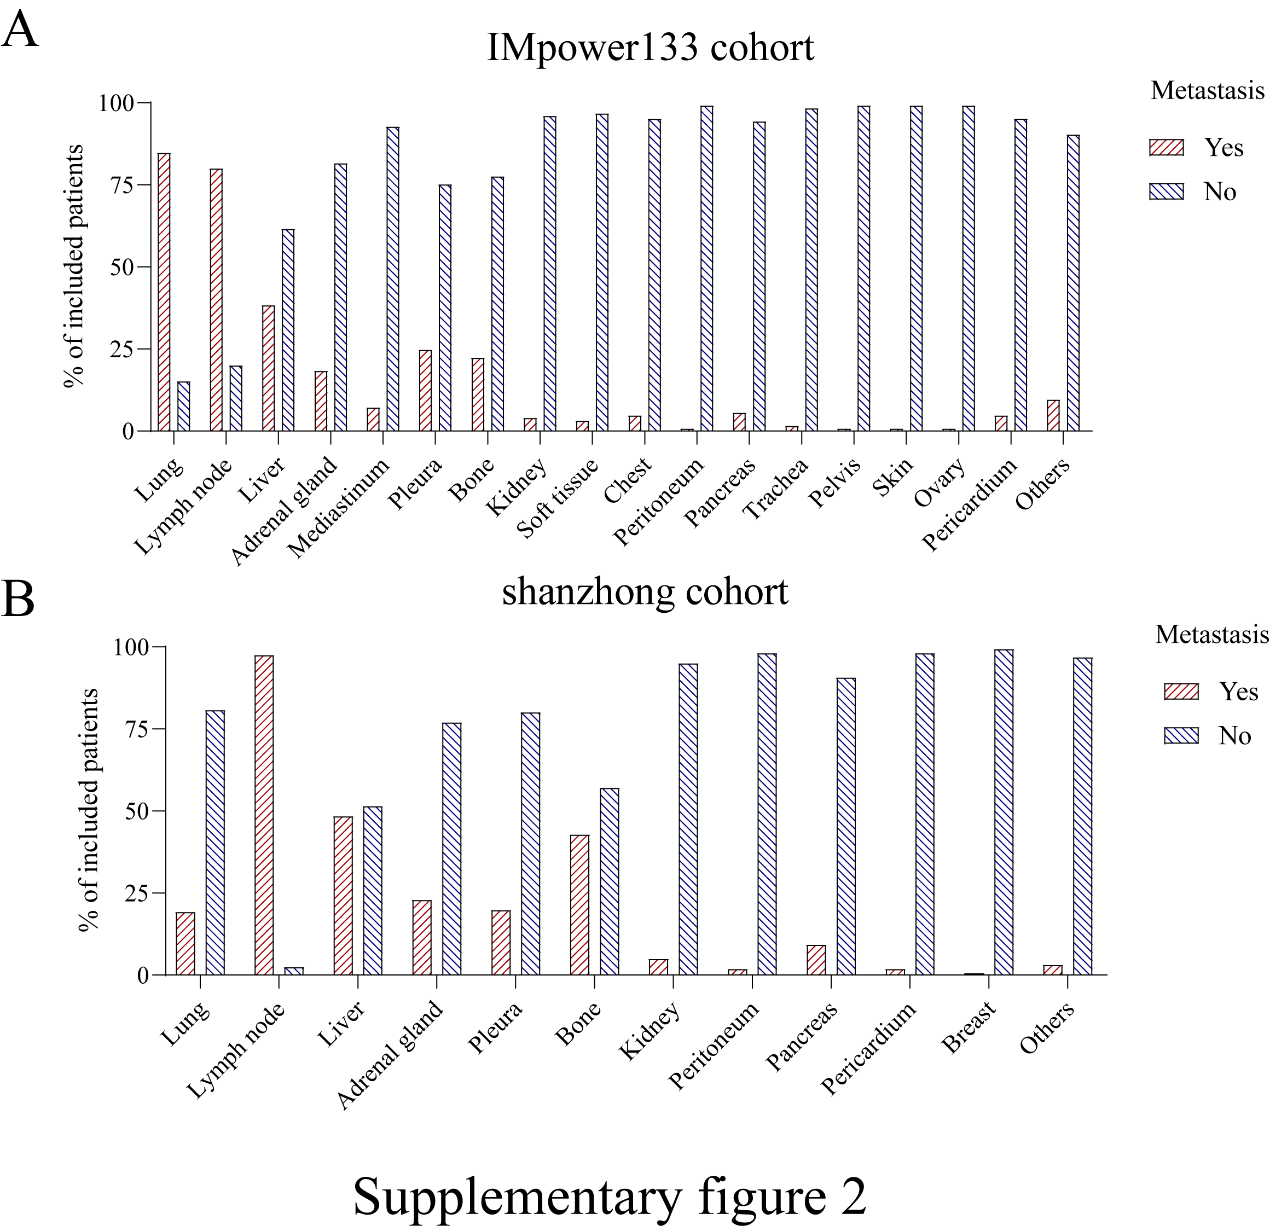
**

**Supplementary figure 2.** Types of metastases among the included patients. **A.** The percentage of patients with different metastatic sites from IMpower 133 cohort. **B.** The percentage of patients with different metastatic sites from shanzhong cohort.

**
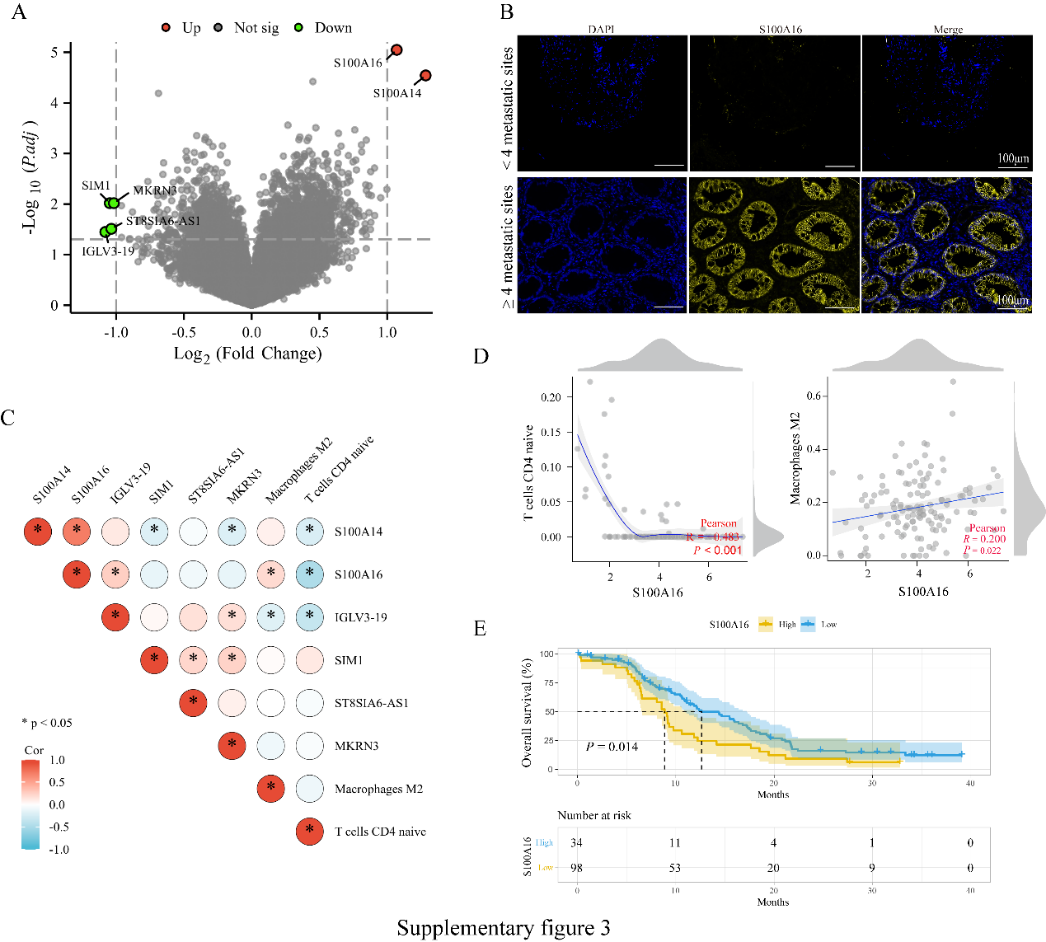
**

**Supplementary figure 3. The association between S100A16 and CD4 naïve T cell and M2 macrophage infiltration in SCLC patients with ICI treatment. A.** Significantly different genes between ES-SCLC patients harboring ≥ 4 metastatic sites and those with < 4 metastatic sites**. B.** Immunofluorescence of S100A16 expression between ES-SCLC patients harboring ≥ 4 metastatic sites and those with < 4 metastatic sites. Scale bars represent 100μm. **C.** The association among significantly altered genes and M2 macrophage and CD4 naïve T cell infiltration. The numbers are shown as correlation coefficient between each of them. Correlation coefficient is a statistic representing how closely two variables co-vary. **D.** The correlation between S100A16 expression and M2 macrophage and CD4 naïve T cell infiltration in SCLC patients with < 4 metastatic sites. **E.** Kaplan–Meier survival analyses of ES-SCLC patients with high and low S100A16. The P value was calculated using a log-rank test. *: P <0.05
